# Supplementary material for: Safety and efficacy of tenecteplase versus alteplase in patients with acute ischaemic stroke (TRACE): a multicentre, randomised, open label, blinded-endpoint (PROBE) controlled phase II study
Source: HighWire-hosted journal article supplement (doi:10.1136/svn-2021-000978), 2021-08-24
Supplement: svn-2021-000978supp001_data_supplement.pdf [file svn-2021-000978supp001_data_supplement.pdf]

## Supplementary material

**Table 1. Result of quality indicators tested between rhTNK- tPA and Melalyse inside Guangzhou Recolgen Biotech Co.,Ltd**

| Item                     | Specification       | rhTNK-tPA2017110402 | rhTNK-tPA2018120102 | rhTNK-tPA2019050102 | Metalyse 804823 | Metalyse 902235 |
|--------------------------|---------------------|---------------------|---------------------|---------------------|-----------------|-----------------|
| Potency                  | Indicated amount%   | 91                  | 95                  | 97                  | 106             | 101             |
| Protein content          | Indicated amount%   | 101                 | 99                  | 101                 | 100             | 96              |
| Purity (electrophoresis) | Monomer content%    | 95.6                | 96.0                | 95.7                | ①               |                 |
| Purity (HPLC)            | Monomer content%    | 98.4                | 98.2                | 98.5                | 98.4            | 99.0            |
|                          | Aggregates content% | 1.5                 | 1.6                 | 1.3                 | 0.9             | 0.6             |
|                          | Two-chain content%  | 4.6                 | 8.8                 | 6.5                 | 41.6            | 34.5            |
| Molecular size           | KD Single-chain     | 69.2                | 68.6                | 67.9                | 68.2            | 70.7            |
|                          | KD Two-chain        | 35.4                | 33.8                | 33.5                | 32.2            | 33.7            |
| Type I/ Type II content  | Type I%             | 29.0                | 29.6                | 30.3                | 29.1            | 29.4            |

| Item                                | Specification | rhTNK-tPA2017110402 | rhTNK-tPA2018120102 | rhTNK-tPA2019050102 | Metalyse 804823     | Metalyse 902235     |
|-------------------------------------|---------------|---------------------|---------------------|---------------------|---------------------|---------------------|
| (Home made)                         | Type II%      | 71.0                | 70.4                | 69.7                | 70.9                | 70.6                |
| Type I/ Type II content(commercial) | Type I%       | 40.9                | 41.0                | 41.2                | 44.1                | 42.2                |
|                                     | Type II%      | 59.1                | 59.0                | 58.8                | 55.9                | 57.8                |
| Host Cell Protein                   | %             | 0.006               | 0.006               | 0.008               | 0.002               | 0.003               |
| Isoelectric point                   | /             | 5.9-6.9             | 5.8-6.9             | 6.0-6.9             | 5.8-7.0             | 5.9-7.0             |
| Tryptic-peptide HapMap              | /             | Met specification   | Met specification   | Met specification   | Same with rhTNK-tPA | Same with rhTNK-tPA |
| PeptideHapMap                       | /             | Met specification   | Met specification   | Met specification   | Same with rhTNK-tPA | Same with rhTNK-tPA |
| Bacterial endotoxin                 | IU/mg         | <1                  | <1                  | <1                  | <1                  | <1                  |
| Sialic acid                         | %             | 98                  | 105                 | 100                 | 82                  | 91                  |
| Exogenous DNAresidues               | <100pg/vial   | Met specification   | Met specification   | Met specification   | Same with rhTNK-tPA | Same with rhTNK-tPA |

| Item                                                                                                                                                                                                  | Specification | rhTNK-tPA201711040<br>2 | rhTNK-tPA2018120<br>102 | rhTNK-tPA201905010<br>2 | Metalyse 804823 | Metalyse 902235 |
|-------------------------------------------------------------------------------------------------------------------------------------------------------------------------------------------------------|---------------|-------------------------|-------------------------|-------------------------|-----------------|-----------------|
| Remark:                                                                                                                                                                                               |               |                         |                         |                         |                 |                 |
| ①Purity of Metalyse and rhTNK-TPA were tested with electrophoresis method, HapMap of Metalyse is a little bit different from rhTNK-TPA, rhTNK-TPA HapMap has Monomer, aggregates and fragment stripe. |               |                         |                         |                         |                 |                 |

**Table 2. Result of quality indicators between rhTNK- tPA and Melalyse outsourced to external company**

| Item                                         | Specification | rhTNK-tPA20171104<br>02                                                                                        | rhTNK-tPA2018120<br>102 | rhTNK-tPA201905010<br>2 | Metalyse 804823 | Metalyse 902235 |
|----------------------------------------------|---------------|----------------------------------------------------------------------------------------------------------------|-------------------------|-------------------------|-----------------|-----------------|
| Relative molecular mass (De sugar reduction) | Da            | 58924.29                                                                                                       | 58924.39                | 58924.39                | 58925.17        | 58924.78        |
| N-terminal sequence                          | /             | Consistent theoretical sequence (NH <sub>2</sub> -Ser-Tyr-Gln-Val-Ile-Cys-Arg-Asp-Glu-Lys-Thr-Gln-Met-Ile-Tyr) |                         |                         |                 |                 |
| C-terminal sequence                          | /             | Consistent theoretical sequence (VTNYLDWIRDNMRP)                                                               |                         |                         |                 |                 |
| Post-translational modifications             | /             | Site of oxidative modification: M13/M207/M455/M490/M525<br>Site of deamidization: N37/N140/N205/N370/N454/Q475 |                         |                         |                 |                 |
| Free sulfhydryl                              | Mol S-H/Mol   | 0.033                                                                                                          | 0.019                   | 0.029                   | 0.213           | 0.222           |
| Glycosylation                                | N103          | 100.0%                                                                                                         | 100.0%                  | 100.0%                  | 100.0%          | 100.0%          |

| Item                                     | Specification                          | rhTNK-tPA20171104<br>02                                             | rhTNK-tPA2018120<br>102 | rhTNK-tPA201905010<br>2 | Metalyse 804823 | Metalyse 902235 |
|------------------------------------------|----------------------------------------|---------------------------------------------------------------------|-------------------------|-------------------------|-----------------|-----------------|
|                                          | N184                                   | 45.1%                                                               | 45.1%                   | 44.2%                   | 51.6%           | 48.8%           |
|                                          | N448                                   | 100.0%                                                              | 99.9%                   | 99.9%                   | 100.0%          | 100.0%          |
|                                          | T61 (O suger)                          | 83.2%                                                               | 83.1%                   | 83.3%                   | 84.5%           | 84.9%           |
| Monosaccharide<br>(pmol/pmol<br>Protein) | Glucosamine                            | 7.63                                                                | 7.65                    | 8.70                    | 8.63            | 7.52            |
|                                          | Galactosamine                          | <0.5                                                                | <0.5                    | <0.5                    | <0.5            | <0.5            |
|                                          | Galactose                              | 4.86                                                                | 4.60                    | 4.38                    | 4.73            | 5.32            |
|                                          | Mannose                                | 5.65                                                                | 5.32                    | 5.08                    | 5.52            | 5.36            |
|                                          | Glucose                                | <0.5                                                                | <0.5                    | <0.5                    | <0.5            | <0.5            |
|                                          | Fucose                                 | 2.78                                                                | 2.57                    | 2.46                    | 3.28            | 3.01            |
| Circular<br>dichroism (CD)               | /                                      | Consistent with Circular dichroism (CD) of Far and near ultraviolet |                         |                         |                 |                 |
|                                          | Helix                                  | 5.9%                                                                | 6.1%                    | 6.0%                    | 5.7%            | 5.9%            |
|                                          | Antiparallel<br>$\beta$ -pleated sheet | 43.1%                                                               | 43.4%                   | 43.4%                   | 42.1%           | 42.0%           |
|                                          | Parallel<br>$\beta$ -pleated sheet     | 3.4%                                                                | 3.4%                    | 3.4%                    | 3.3%            | 3.3%            |
|                                          | Turn                                   | 18.9%                                                               | 19.0%                   | 18.9%                   | 18.8%           | 19.0%           |

| Item            | Specification             | rhTNK-tPA20171104<br>02                                                                                                     | rhTNK-tPA2018120<br>102 | rhTNK-tPA201905010<br>2 | Metalyse 804823 | Metalyse 902235 |
|-----------------|---------------------------|-----------------------------------------------------------------------------------------------------------------------------|-------------------------|-------------------------|-----------------|-----------------|
|                 | Irregular crimp           | 31.1%                                                                                                                       | 30.8%                   | 30.9%                   | 31.7%           | 31.6%           |
| Thermostability | (°C) Hot melt temperature | 70.13                                                                                                                       | 70.01                   | 69.88                   | 65.84           | 65.62           |
| Aggregates      | Peak 1                    | 1.65%                                                                                                                       | 1.68%                   | 1.59%                   | 1.48%           | 0.95%           |
|                 | Peak 2                    | 98.35%                                                                                                                      | 98.32%                  | 98.41%                  | 98.52%          | 99.15%          |
|                 | Peak 3                    | -                                                                                                                           | -                       | -                       | -               | -               |
|                 | KDPeak 1 molecular size   | 124.2 (±25.8%)                                                                                                              | 112.8 (±80.7%)          | 132.8 (±57.4%)          | 118.6 (±22.5%)  | 120.6 (±40.6%)  |
|                 | KDPeak 2 molecular size   | 62.3 (±2.3%)                                                                                                                | 60.5 (±2.1%)            | 59.8 (±1.8%)            | 61.2 (±1.7%)    | 60.8 (±1.2%)    |
|                 | /                         | It is supposed that Peak 1 is an aggregate peak of conjugate of monomer and fractured fragment, and Peak 2 is monomer peak. |                         |                         |                 |                 |

**Table 3. The participating sites and number of patients enrolled in each site**

|   | Sites                                        | N  |
|---|----------------------------------------------|----|
| 1 | Linyi People's Hospital                      | 64 |
| 2 | Baogang Hospital of Inner Mongolia           | 21 |
| 3 | General Hospital of Northern Theater Command | 20 |
| 4 | Yantai Yuhuanding Hospital                   | 18 |

|              |                                                       |     |
|--------------|-------------------------------------------------------|-----|
| 5            | The First People's Hospital of Shenyang               | 18  |
| 6            | Mei He Kou Central Hospital                           | 15  |
| 7            | Beijing Tiantan Hospital,Capital,Medical University   | 13  |
| 8            | Zhongshan Hospital of Fudan University                | 12  |
| 9            | The First Bethune Hospital of JILIN University        | 12  |
| 10           | Tangshan Gongren Hospital                             | 8   |
| 11           | The Third Hospital of HEBEI Medical University        | 7   |
| 12           | Huai'an Second People's Hospital                      | 6   |
| 13           | The First Affiliated Hospital of Zhengzhou University | 5   |
| 14           | Huashan Hospital of Fudan University                  | 4   |
| 15           | The First Hospital of QIQIHAR                         | 4   |
| 16           | The First Affiliated Hospital of Jinan University     | 2   |
| 17           | The Affiliated Hospital of Guizhou Medical University | 2   |
| 18           | West China Hospital,Sichuan University                | 2   |
| 19           | The Ninth People's Hospital of Chongqing              | 2   |
| 20           | Hainan General Hospital                               | 2   |
| 21           | Baotou City Central Hospital                          | 2   |
| 22           | Luo Yang First People's Hospital                      | 1   |
| Total number |                                                       | 240 |

**Table 4. Inclusion and exclusion criteria**

|                                                                                                                    |
|--------------------------------------------------------------------------------------------------------------------|
| Inclusion criteria                                                                                                 |
| Age is $\geq 18$ years                                                                                             |
| Acute ischemic stroke symptom onset < 3 hours; onset time refers to the time the patient was last known to be well |

|                                                                                                                                              |
|----------------------------------------------------------------------------------------------------------------------------------------------|
| Ischemic stroke is defined as sudden acute focal neurological impairment with suspected cerebral ischemia, hemorrhage ruled out by NCCT scan |
| Pre-stroke mRS score $\leq 2$ or without history of stroke                                                                                   |
| Baseline National Institutes of Health Stroke Scale (NIHSS) score between 4 and 26                                                           |
| Signed informed consent                                                                                                                      |
| Exclusion Criteria                                                                                                                           |
| Absolute contraindications:                                                                                                                  |
| ● History of severe head trauma or stroke within 3 months                                                                                    |
| ● Suspected subarachnoid hemorrhage                                                                                                          |
| ● Arterial puncture at a non-compressible site within the previous 1 week                                                                    |
| ● History of intracranial hemorrhage                                                                                                         |
| ● Intracranial tumor, vascular malformation, or arterial aneurysm                                                                            |
| ● Recent intracranial or intraspinal surgery                                                                                                 |
| ● Systolic blood pressure $\geq 180$ mm Hg, or diastolic blood pressure $\geq 100$ mm Hg; Increased blood pressure                           |
| ● Active internal bleeding                                                                                                                   |
| ● Acute bleeding tendency, including platelet count below $100 \times 10^9/L$ or otherwise                                                   |
| ● Heparin treatment was performed within 48 h ( APTT exceeded the upper limit of normal range )                                              |

|                                                                                                                                                                                                                                                                                                                                                                                                                                                 |
|-------------------------------------------------------------------------------------------------------------------------------------------------------------------------------------------------------------------------------------------------------------------------------------------------------------------------------------------------------------------------------------------------------------------------------------------------|
| <ul style="list-style-type: none"> <li>● Warfarin has been taken orally , and international normalized ratio (INR) is <math>&gt; 1.7</math> or prothrombin time (PT) <math>&gt; 15</math> s</li> </ul>                                                                                                                                                                                                                                          |
| <ul style="list-style-type: none"> <li>● Anticoagulant drugs such as thrombin inhibitor or Xa factor inhibitor, argatroban ( including new anticoagulants with unclear mechanism ) are currently being used , and various sensitive laboratory tests are abnormal ( such as live ) APTT , INR , Platelet count , Serpentine ECT of pulse enzyme setting time ; thrombin time TT or appropriate determination of Xa factor activity )</li> </ul> |
| <ul style="list-style-type: none"> <li>● Blood glucose <math>&lt; 2.7</math> mmol/L</li> </ul>                                                                                                                                                                                                                                                                                                                                                  |
| <ul style="list-style-type: none"> <li>● CT showed multilobular infarction ( low density <math>&gt; 1 / 3</math> cerebral hemisphere )</li> </ul>                                                                                                                                                                                                                                                                                               |
| <p>Relative contraindications: The risks and benefits of thrombolysis should be carefully considered and weighed in the following cases (that is, although there is one or more relative contraindications, it is not absolutely impossible to thrombolysis)</p>                                                                                                                                                                                |
| <ul style="list-style-type: none"> <li>● Mild stroke or stroke with rapid improvement of symptoms</li> </ul>                                                                                                                                                                                                                                                                                                                                    |
| <ul style="list-style-type: none"> <li>● Women in pregnancy</li> </ul>                                                                                                                                                                                                                                                                                                                                                                          |
| <ul style="list-style-type: none"> <li>● Symptoms of neurological impairment after seizures</li> </ul>                                                                                                                                                                                                                                                                                                                                          |
| <ul style="list-style-type: none"> <li>● There have been major surgical operations or serious injuries in the last 2 weeks</li> </ul>                                                                                                                                                                                                                                                                                                           |
| <ul style="list-style-type: none"> <li>● There were gastrointestinal or urinary system bleeding in recent 3 weeks</li> </ul>                                                                                                                                                                                                                                                                                                                    |
| <ul style="list-style-type: none"> <li>● History of myocardial infarction within 3 months</li> </ul>                                                                                                                                                                                                                                                                                                                                            |
| <p>Participated in other clinical trials within 30 days before randomization or currently involved in other clinical trials</p>                                                                                                                                                                                                                                                                                                                 |
| <p>Pregnant women, nursing mothers , or reluctanc to take effective contraceptive measures during the trial</p>                                                                                                                                                                                                                                                                                                                                 |



|                                                                                                                                                                                   |
|-----------------------------------------------------------------------------------------------------------------------------------------------------------------------------------|
| Known allergy to rhTNK-tPA and/or rt-PA or relevant excipients                                                                                                                    |
| Any condition that, in the judgment of the investigator could impose hazards to the patient if study therapy is initiated or affect the participation of the patient in the study |
| Can not comply with the test program or follow-up requirements                                                                                                                    |

**Table 5. Missing data of primary efficacy outcomes**

|                     | 0.1mg/kg(N=60) | 0.25mg/kg(N=57) | 0.32mg/kg(N=60) | rt-PA(N=59) |
|---------------------|----------------|-----------------|-----------------|-------------|
| Missing data n(%)   | 6 (10.00%)     | 6 (10.53%)      | 4 (6.67%)       | 4 (6.78%)   |
| Death               | 4 (6.67%)      | 0 (0.00%)       | 4 (6.67%)       | 3 (5.08%)   |
| Telephone follow-up | 2 (3.33%)      | 6 (10.53%)      | 0 (0.00%)       | 1 (1.69%)   |

**Table 6. Efficacy outcome comparison of TNK groups**

|                                    | rhTNK-tPA |           |           | p value |
|------------------------------------|-----------|-----------|-----------|---------|
|                                    | 0.1mg/kg  | 0.25mg/kg | 0.32mg/kg |         |
| <b>Intention-to-treat analysis</b> |           |           |           |         |
| Improvement on NIHSS at 14 days    | 38(63.3)  | 44(77.2)  | 40(66.7)  | 0.24    |

|                                         |          |          |          |      |
|-----------------------------------------|----------|----------|----------|------|
| mRS score $\leq$ 1 point at 3 months    | 33(55.0) | 35(63.6) | 36(62.1) | 0.60 |
| mRS score $\leq$ 2 point at 3 months    | 41(68.3) | 42(76.7) | 41(70.7) | 0.62 |
| Ordinal distribution of mRS at 3 months | /        | /        | /        | 0.71 |

---

**Per-protocol analysis**


---

|                                         |          |          |          |      |
|-----------------------------------------|----------|----------|----------|------|
| Improvement on NIHSS at 14 days         | 37(67.3) | 37(78.7) | 39(69.6) | 0.41 |
| mRS score $\leq$ 1 point at 3 months    | 32(58.2) | 29(63.0) | 35(63.6) | 0.81 |
| mRS score $\leq$ 2 point at 3 months    | 38(69.1) | 35(76.1) | 40(72.7) | 0.73 |
| Ordinal distribution of mRS at 3 months | /        | /        | /        | 0.75 |

---

**Table 7. SAEs within 90 days by system organ class**

|                                                 | rhTNK-tPA       |                  |                  | rt-PA           |
|-------------------------------------------------|-----------------|------------------|------------------|-----------------|
|                                                 | 0.1mg/kg (N=60) | 0.25mg/kg (N=57) | 0.32mg/kg (N=60) | 0.9mg/kg (N=59) |
| Metabolic and nutritional diseases              | 1               | 0                | 0                | 0               |
| Infections and infestations                     | 2               | 1                | 2                | 1               |
| Nervous system disorders                        | 3               | 3                | 5                | 5               |
| Injury, poisoning and procedural complications  | 6               | 1                | 0                | 2               |
| Respiratory, thoracic and mediastinal disorders | 1               | 1                | 2                | 2               |

---

|                                                   |   |   |   |   |
|---------------------------------------------------|---|---|---|---|
| Systemic disease and administration site reaction | 1 | 1 | 0 | 1 |
| Gastrointestinal disorders                        | 1 | 1 | 1 | 0 |
| Cardiac disorders                                 | 0 | 0 | 1 | 3 |
| Eye disorders                                     | 0 | 0 | 1 | 0 |

---
